# Supplementary material
Source: PubMed Central journal article supplement (PMC2830398)
Supplement: NIHMS167911-supplement-1_si_001.pdf [file NIHMS167911-supplement-1_si_001.pdf]

# Polymer-Cisplatin Conjugate Nanoparticles for Acid-Responsive Drug Delivery

Santosh Aryal, Che-Ming Jack Hu, Liangfang Zhang\*

Department of Nanoengineering and Moores Cancer Center, University of California San Diego, La Jolla, CA 92093

\*Corresponding author, Tel: 858-246-0999, Email: [zhang@ucsd.edu](mailto:zhang@ucsd.edu)

## Supporting Information

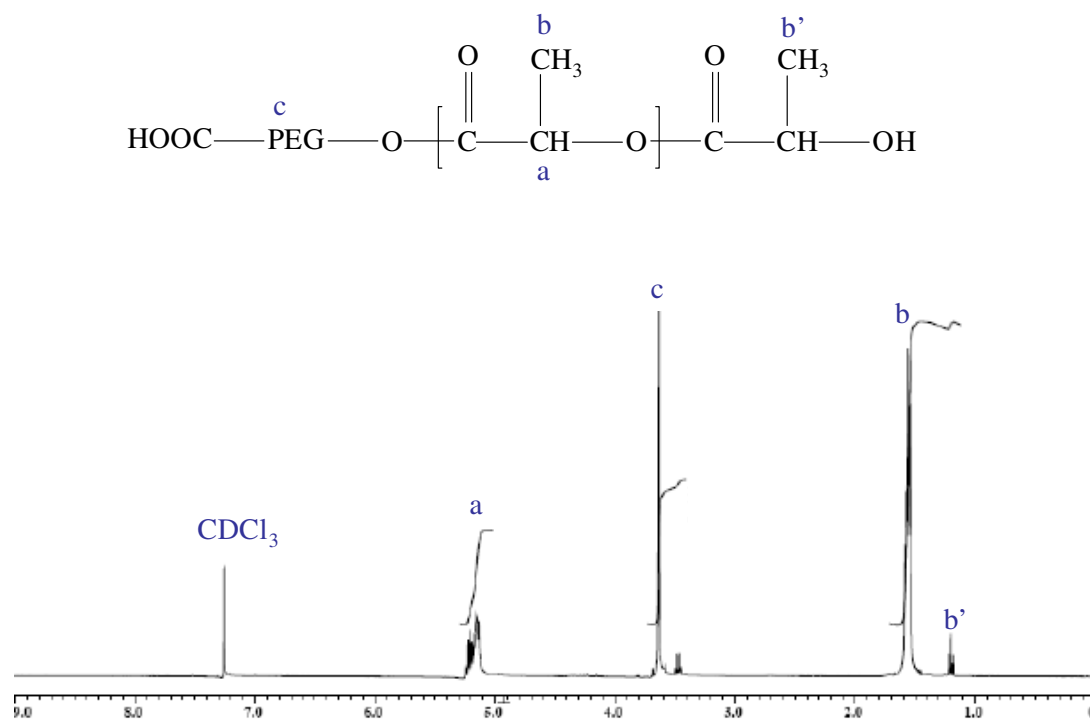

**Figure S1.**  $^1\text{H}$  NMR spectrum of synthesized PEG-PLA diblock copolymer.

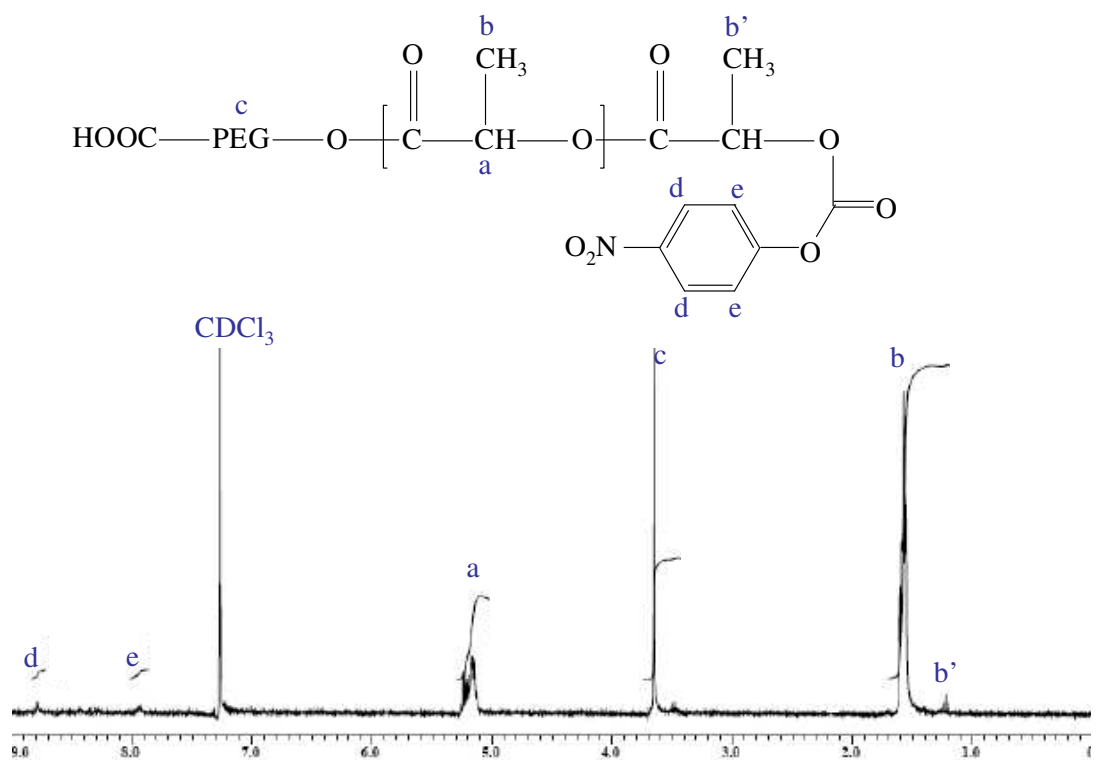

**Figure S2.** <sup>1</sup>H NMR spectrum of activated PEG-PLA.

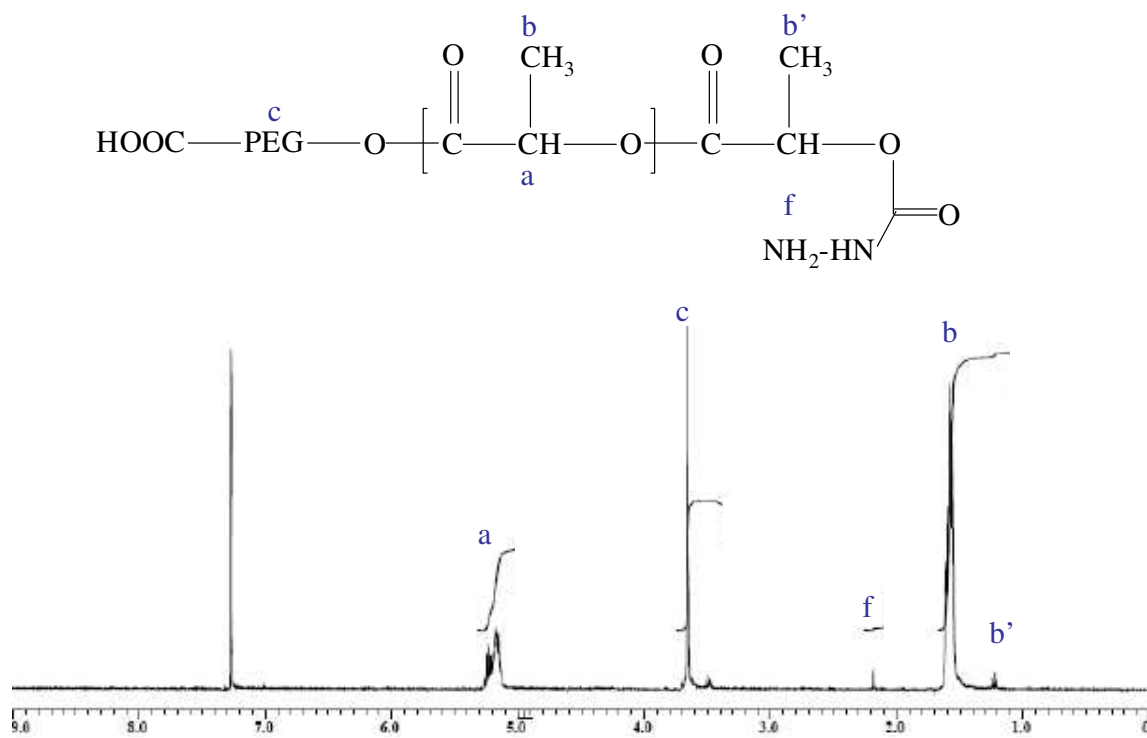

**Figure S3.** <sup>1</sup>H NMR spectrum of hydrazine derivatized PEG-PLA (PEG-PLA-NH-NH<sub>2</sub>).

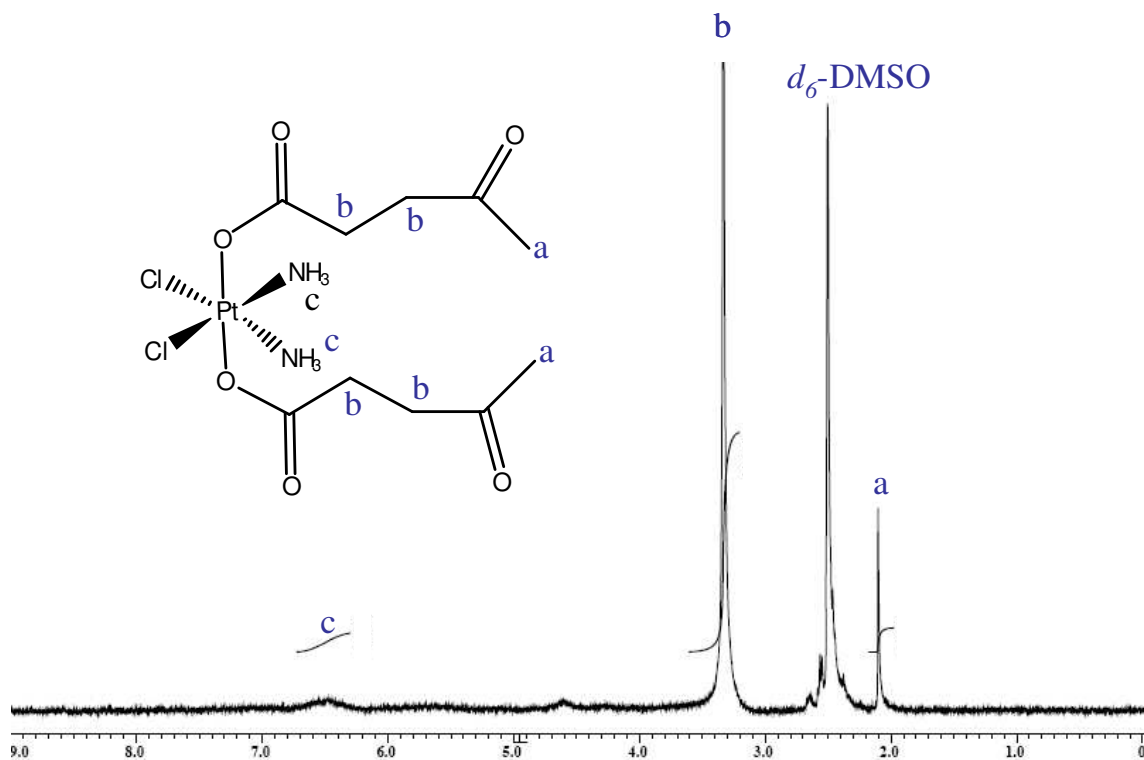

**Figure S4.**  $^1\text{H}$  NMR spectrum of levilunic acid functionalized cisplatin,  $\text{PtCl}_2(\text{OCOCH}_2\text{CH}_2\text{COCH}_3)_2(\text{NH}_3)_2$ .

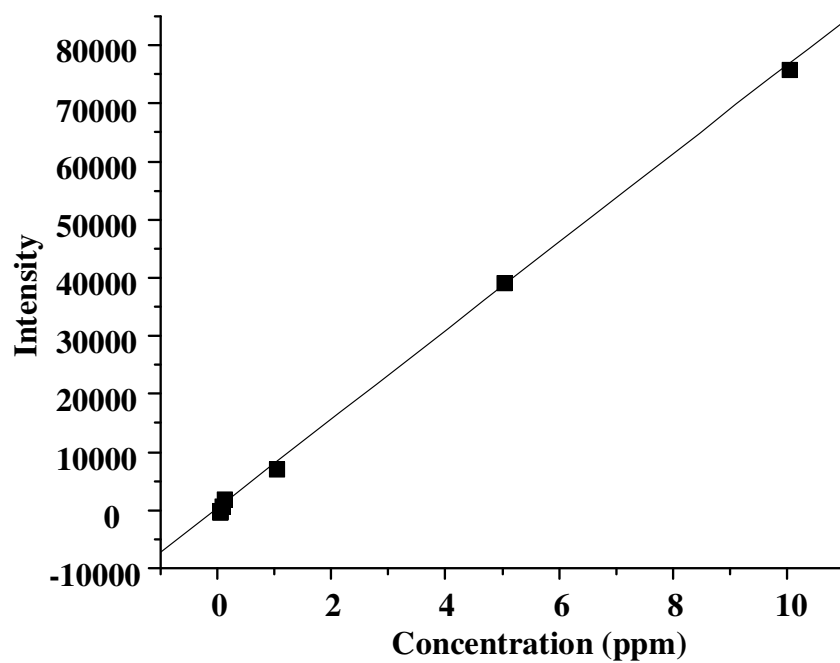

**Figure S5.** ICP-OES calibration curve for the measurement of cisplatin content.
